# Supplementary material for: Bioprinted thrombosis-on-a-chip
Source: Royal Society of Chemistry journal article supplement (doi:10.1039/c6lc00380j), 2016-01-01
Supplement: c6lc00380j3.pdf [file c6lc00380j3.pdf]

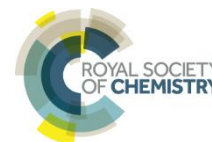

## Lab on a Chip

### ARTICLE

#### Supplementary Information

### Bioprinted Thrombosis-on-a-Chip

Yu Shrike Zhang<sup>a,b,c,§</sup>, Farideh Davoudi<sup>a,b,§</sup>, Philipp Walch<sup>a,b,d,§</sup>, Amir Manbachi<sup>a,b,§</sup>, Xuan Luo<sup>a,b,e,†</sup>, Valeria Dell'Erba<sup>a,b,f,†</sup>, Amir K. Miri<sup>a,b</sup>, Hassan Albadawi<sup>g</sup>, Andrea Arneri<sup>a,b</sup>, Xiaoyun Li<sup>a,b,h</sup>, Xiaoying Wang<sup>a,b,h</sup>, Mehmet Remzi Dokmeci<sup>a,b,c</sup>, Ali Khademhosseini<sup>a,b,c,i,j,\*</sup>, Rahmi Oklu<sup>a,b,k,\*</sup>

<sup>a.</sup> Biomaterials Innovation Research Center, Division of Biomedical Engineering, Department of Medicine, Brigham and Women's Hospital, Harvard Medical School, Cambridge, MA 02139, USA

<sup>b.</sup> Harvard-MIT Division of Health Sciences and Technology, Massachusetts Institute of Technology, Cambridge, MA 02139, USA

<sup>c.</sup> Wyss Institute for Biologically Inspired Engineering, Harvard University, Boston, MA 02115, USA

<sup>d.</sup> Institute of Pharmacy and Molecular Biotechnology, Heidelberg University, Im Neuenheimer Feld 364, D-69120, Germany

<sup>e.</sup> Université de Technologie de Compiègne, Rue du Dr Schweitzer, Compiègne 60200, France

<sup>f.</sup> Department of Biomedical Engineering, Politecnico di Torino, 10129 Torino, Italy

<sup>g.</sup> Department of Surgery, Division of Vascular and Endovascular Surgery, Massachusetts General Hospital, Boston, MA 02114, USA

<sup>h.</sup> State Key Laboratory of Pulp and Paper Engineering, South China University of Technology, Guangzhou, 510640, P.R. China

<sup>i.</sup> Department of Bioindustrial Technologies, College of Animal Bioscience and Technology, Konkuk University, Hwayang-dong, Gwangjin-gu, Seoul 143-701, Republic of Korea

<sup>j.</sup> Department of Physics, King Abdulaziz University, Jeddah 21569, Saudi Arabia

<sup>k.</sup> Division of Vascular & Interventional Radiology, Mayo Clinic, Scottsdale, AZ 85259, USA

<sup>§</sup> Y.S.Z., F.D., P.W., A.M. contributed equally as primary authors. <sup>†</sup> X.L., V.D. contributed equally as second authors.

\* Corresponding Authors: [oklu.rahmi@mayo.edu](mailto:oklu.rahmi@mayo.edu); [alik@bwh.harvard.edu](mailto:alik@bwh.harvard.edu)

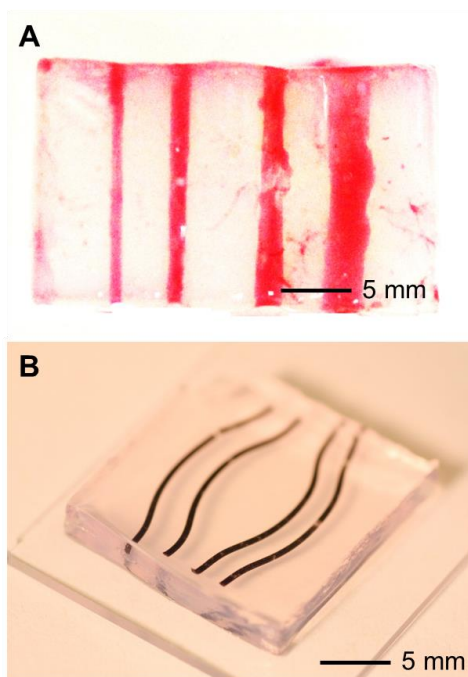

**Supplementary Fig. S1** (A) A GelMA construct containing microchannels with a series of different diameters of up to 3 mm. (B) A GelMA construct containing microchannels with different tortuosity.

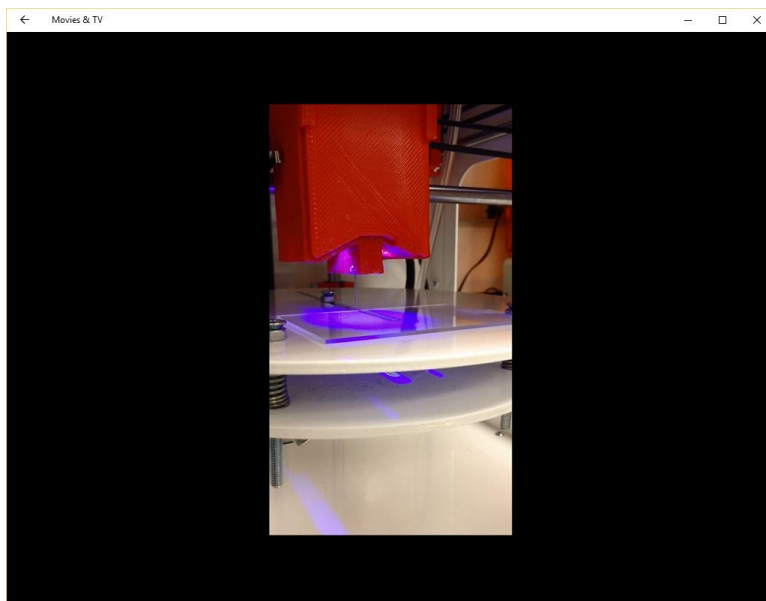

**Supplementary Movie S1** Video showing the bioprinting process for fabricating the sacrificial Pluronic scaffold.

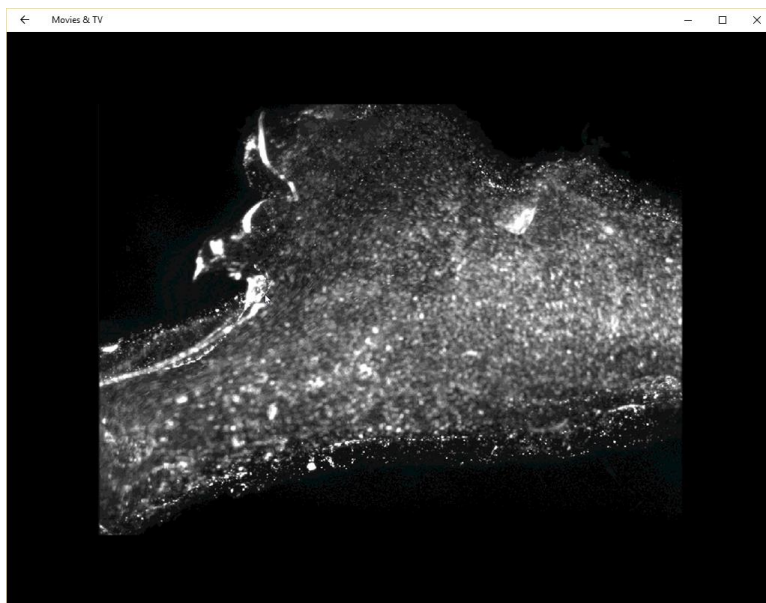

**Supplementary Movie S2** Video showing particle image velocimetry (PIV) used to quantitatively analyze the flow velocity profiles in the bifurcation configuration.
